# Supplementary material for: Functional stratification of cancer drugs through integrated network similarity
Source: NPJ Syst Biol Appl. 2022 Apr 19;8:11. doi: 10.1038/s41540-022-00219-8 (PMC9018743; doi:10.1038/s41540-022-00219-8)
Supplement: Supplementary file 3 — Dataset 1 [file 41540_2022_219_MOESM3_ESM.xlsx]

## Sheet: Drugs_grouped_by_Maccs_Keys
Group1	Group2	Group3	Group4	Group5
Etoposide	Tretinoin	CC-401	4,5,6,7-tetrabromobenzotriazole	Dexamethasone
Ginkgetin		Dinaciclib	Pyrazolanthrone	Pravastatin
Curcumin		BIX-01294	Belinostat	Geldanamycin
Exifone		BIX-01338	Trichostatin-a	Verteporfin
Resveratrol		I-BET-151	Vorinostat	Methylstat
		I-BET-762	Niclosamide	Everolimus
		UNC-0321	PD-0325901	Sirolimus
		UNC-1215	Salermide	Tacrolimus
		GSK-J4	Tacedinaline
		Tofacitinib
		OSI-027
		Selumetinib
		Staurosporine
		Sotrastaurin
		epz004777
		EPZ-005687
		Lenalidomide
		Palbociclib
		Decitabine
		Zebularine
		Alpelisib
		Olaparib
		Alvocidib
		KU-55993
		LY-294002
		Rolipram
		Semagacestat
		CHIR-99021
		BMS-345541
		Roscovitine
		Ruxolitinib
		Entinostat
		Losmapimod
		RG-4733
		EX-527
		IKK-inhibitor-X
		IPI-145
		Nilotinib
		RGFP-966
		AR-A014418
		JQ1
		KN-62
		KN-93
		TG-101348
		Pazopanib
		VE-822
		Vemurafenib

## Sheet: Drugs_grouped_by_MoA
PROTEIN KINASE INHIBITORS
Serine/threonine-protein kinases	ATM Kinase Inhibitors	KU-55933	ATP competitive inhibitor, dsDNA break	ATM, ATR, PRKDC, p53, E2F1
			repair enzymes inhibitors, dual ATM/ATR inhibitors
	ATR Kinase Inhibitors	VE-822	ATP competitive inhibitor, dsDNA break	ATR, ATM, PIK3CG, mTOR
			repair enzymes inhibitors, dual ATM/ATR inhibitors
	Calcium/Calmodulin Dependent Protein Kinase Inhibitors	KN-93	Selective, Antagonizes CaM binding	CaMKII, K+ channel blocker, CaMK4
		KN-62	Selective, Orthosteric inhibitor, competative, non-competative inhibitor of purinergic receptor (antagonist)	CaMKII, P2RX7, CHK1, ERK2, LCK, MAPK12 (p38), PRKCA, AKT1, ROCK1, S6K1, SGK1, p38 alpha, p38 beta, JNK1
	Casein Kinase II inhibitors	4,5,6,7-tetrabromobenzotriazole	Specific, ATP/GTP competitive inhibitor	CSNK2A1, AMPK, CHK1, MEK1, ERK2, GSK-3B, LCK, MAPK12, PRKCA, AKT1, ROCK1, S6K1, SGK1, p38 alpha, p38 beta, JNK1
	CDK inhibitors	Alvocidib	Pan-CDK inhibitor, synthetic flavonoid	CDK1, CDK2, CDK4, CDK5, CDK6, CDK7, CDK8, CDK9, Epidermal growth factor receptor, Glycogen phosphorylase (muscle, brain, liver isoforms)
		Dinaciclib	Pan-CDK inhibitor, shows bromodomain interaction	CDK1, CDK2, CDK5, and CDK9
		Palbociclib	Selective, acts by binding to the ATP pocket	CDK4, CDK6, D2R, D4R, 5HTR
		Seliciclib	Pan-CDK inhibitor, competing for the ATP binding sites	CDK1, CDK2, CDK7, CDK9, MAPK1, MAPK3, Casein kinase I isoform epsilon
	Glycogen synthase kinase 3 inhibitors	AR-A014418	Selective, ATP-competitive, GSK-3β inhibitor can promote human atrial cardiomyocyte proliferation	GSK3B
		CHIR-99021	Selective, ATP-competitive, enhances MSCs trans-differentiation, GSK-3β inhibitor can promote human atrial cardiomyocyte proliferation, WNT pathway activator	CDK1, GSK3A, GSK3B, MAPK1
	IKK Inhibitors	IKK-inhibitor-X	ATP-competitive, and reversible, Blocks cellular IκBα phosphorylation and NF-κB activation	IKK
		BMS-345541	highly selective IKKα and IKKβ inhibitor, binds to similar allosteric sites on IKK-1 and IKK-2	CHUK(IKK-1), IKBKB (IKK-2)
	JNK inhibitors	CC-401	ATP-competative inhibitor	JNK1 (MAPK8), JNK2 (MAPK9), JNK3 (MAPK10)
		pyrazolanthrone	Selective, competitively and reversibly inhibits	JNK1 (MAPK8), JNK2 (MAPK9), JNK3 (MAPK10), MAPK8IP1, LRRK2, TTK
	mTOR inhibitor	Everolimus	Indirect,Selective, Rapamycin derivative, (FKBP-12, FK506(Tacrolimus-binding protein), inhibits both mTORC1 and mTORC2 complexes (mTOR)	FKBP1A (FKBP-12)
		OSI-027	Direct, Selective, ATP-competitive, inhibits both mTORC1 and mTORC2 complexes	allosteric binding to mTORC1 and mTORC2 complexes
		Sirolimus/ rapamycin	inhibits mTORC1 (mTOR)	CCR5, FKBP1A, FGF2
	MAP Kinase Inhibitors	Losmapimod	Selective, competing for the kinase ATP binding site, COVID19à modulation of DUX4 expression	MAPK14 (p38)
	MAP3K Inhibitors	Vemurafenib	Competitive by binding to the ATP-binding domain, , inhibition of MAPK pathway	BRAF (mutation containing V600E), RAF1
	PKC Inhibitors	Sotrastaurin	Reversible, pan-protein kinase C inhibitor, shows selectivity for PKCθ	Mostly PKCθ, than PKCα, PKCβ, lesser PKC-λ ,no activity against PKCζ
		Staurosporine	A broad spectrum, ATP competitive protein kinase inhibitor, relatively nonspecific inhibitor of protein kinase C	LCK, PIM1, ITK/TSK, SYK, MAPKAPK2, CSK, PIK3CG, PDPK1, PKCα, PKCβ, PKC-λ, PKCη, PKCγ, PKCε, ZAP-70, CHRM1, IKKB
Tyrosine kinase	Bcr-Abl inhibitor	Nilotinib (AMN107)	Selective, Competative, ATP mimics	DDR-1>DDR-2>BCR-Abl (Abl)>PDGFRalpha/beta>KIT>CSF-1R, MAPK11 (p38beta), MAPK12 (p38alpha), ZAK kinase
	JAK inhibitors	ruxolitinib	ATP competitive, selectively JAK1 and JAK2, competitively inhibits the transport function of ABCB1	JAK-1, JAK-2, PLAUR, JAK3, TYK2
		tofacitinib	Selective, partial and reversible	JAK-1, JAK-2, JAK-3, TYK2
		TG-101348	competitive inhibitor, selective inhibitor of JAK2	JAK-1, JAK-2, FLT3,
	Multi-kinase inhibitor	pazopanib	ATP competative inhibitor binds to intracellular side of TKRs and prevents the ATP-induced activation, angiogenesis related	KIT, VEGFR2 (KDR), BRAF, CSF1R, DDR2, FGF1, FGFR1, FGFR3, VEGFR1 (FLT1), VEGFR3(FLT4), ITK, PDGFRA, PDGFRB, SH2B3
Dual-specificity kinase	MEK Inhibitors	PD-0325901	Selective, non ATP-competitive, enhances iPSCs generation	MAP2K1 (MEK1)
		selumetinib	Selective, non ATP-competitive	MAP2K1 (MEK1)
Other Protein Kinases	PI3K Kinases Inhibitors	LY-294002	pan-PI3K inhibitor, acts on the ATP-binding site, also shows BET Bromodomains inhibition, autophagy and apoptosis activator/inhibitor according to PI3K class present in the cell	PI3Kα, PI3Kδ, PI3Kβ, PIM1, ADORA1, CK2, DNA-PK
		Alpelisib	Selective, isoform-specific PI3K inhibitors	PIK3CA and minor PIK3CB, PIK3CD, PIK3CG, PI4KA
		IPI-145	Selective, dual isoform-specific PI3K inhibitors	PIK3CD, PIK3CG and minor PIK3CA, PIK3CB
EPIGENETIC MODULATORS
Histone Acetylation Readers	Bromodomain BET-inhibitors	I-BET-151	Competitive, Reversible interacts with bromodomain	BRD2, BRD3, BRD4, BRDT
		I-BET-762	Reversible interacts with bromodomain	BRD2, BRD3, BRD4, BRDT
		JQ-1	Reversible interacts with bromodomain	BRD2, BRD3, BRD4, BRDT
DNA Methyl Transferases	DNA Methyl Transferase Inhibitor	Decitabine	Cytidine analogue, Irreversible	DNMT1, DNMT3A, DNMT3B
		Zebularine	Cytidine analogue, competitive transition state analog inhibitor of cytidine deaminase, Irreversible DNMT1 inhibitor	DNMT1, cytosine deaminase
Histone Deacetylases	HDAC inhibitors	Belinostat	pan-HDAC inhibitor (Class I & Class II), Hydroxamic Acid Class	HDAC1, HDAC5, HDAC6
		Trichostatin-a	pan-HDAC inhibitor (Class I & Class II), Hydroxamic Acid Class, inhibiting the activation of the PI3K/Akt and ERK1/2 pathways (ESCC cell)	HDAC1, HDAC2, HDAC3, HDAC4, HDAC5, HDAC6, HDAC7, HDAC8, HDAC9, HDAC10
		Vorinostat	Pan-HDAC inhibitor (class I, II and IV), Hydroxamic Acid Class, inhibit multiple pathways by degrading HIF-1α, inactivating Hsp90, and degrading Akt, hyperacetylation of alpha tubulin, inhibition of transcriptional repression by Bcl-6	HDAC1, HDAC2, HDAC3, HDAC5, HDAC6, HDAC8 HDAC10, HDAC11,
		Entinostat	selectively inhibits class I HDAC / Benzamide class	HDAC1, HDAC2, HDAC3, HDAC8
		Tacedinaline	selectively inhibits class I HDAC / Benzamide class	HDAC1, HDAC2, HDAC3
		RGFP-966	selectively inhibits class I HDAC / Benzamide class	HDAC1, HDAC2, HDAC3, highly selective against HDAC3 (Highly expressed in brain)
		EX-527	Selective inhibitor of SIRT1 (Class III HDAC), occupies the nicotinamide site and a neighboring pocket, promotes differentiation of pluripotent P19 cells into functional neurons	SIRT1
		Salermide	Proapoptotic inhibitor affects through SIRT-1 (Class III HDAC)	SIRT1, SIRT2
	HDAC Activators	Exifone	Selective, potent activator of HDAC1-mediated deacetylation (Class I HDAC)	*not known ???
		Resveratrol	phytoalexin polyphenolic compound, activates SIRT1 (Class III HDAC), anti-inflammatory, antioxidant, also an antiangiogenic factor, inhibits mitogen-activated protein kinases, and modulates the large-conductance calcium-activated potassium channels	COX-1, COX-2, NQO2, CSNK2A1, ALOX5, ALOX15, AHR, PI4K2B, ITGAV, ITGA3, APP, SNCA, ESR1, MTNR1A, MTNR1B, EGFR-5, NR1I2, NR1I3, SLC2A1, CBR1, PPARA, PPARG, AKT1, FUBP1, YARS1, APOA1, BACE1, MAOA, SCN5A, TXNRD1, TXNRD2, XDH, Activates SIRT1
Histone Lysine Demethylases	H3K27me3/me2-demethylases inhibitors	GSK-J4	specific inhibitor, inhibits LPS-induced TNF-α production	KDM6A, KDM6B, TNF
	Jumonji C domain-containing histone demethylase inhibitors	Methylstat	H3K9Me3/Me2/Me1, H3K27Me3/Me2, H3K36Me3, H4K20Me1	JMJD2A (KDM4A), JMJD2C (KDM4C), JMJD2E(KDM4E), JMJD3(KDM6B), PHF8(KDM7B)
Histone Lysine Methyltransferases	Histone Lysine Methylase Inhibitors	BIX-01294	Specific, a potent modulator of stem cell differentiation, potentiates induction of pluripotent stem cells from somatic cells in vitro. Bcl2 inhibition (in acute T lymphoblastic leukemia cells)	EHMT1(GLP), EHMT2 (G9a)
		BIX-01338	Pan-inhibitor	EHMT1(GLP), EHMT2 (G9a), PRMT1, SET7/9, SUV39H1
		EPZ004777	Specific, selectively inhibits H3K79 methylation, blocks expression of leukemogenic genes	DOT1L
		EPZ-005687	Specific, selectively inhibits H3K27 methylation	EZH2
		UNC-0321	Selective, inhibits H3K9me2 accumulation, also a high affinity GPCRs inhibitor	EHMT2(G9a)
Chromatin-interacting transcriptional factors	Chromatin-interacting transcriptional repressors	UNC-1215	Selective, antagonist	L3MBTL3 (a member of the malignant brain tumor (MBT) family of chromatin-interacting transcriptional repress)
OTHERS
E3 Ubiquitin Ligase Complex	cullin-RING ligases (CRLs), DCX E3 protein ligase complex substrate recognition component (Protein Cereblon) inhibitors	Lenalidomide	Thalidomide analog, inhibition of the synthesis of TNF-α, apoptosis induction	Protein cereblon, Tumor necrosis factor ligand superfamily member 11, Cadherin-5, Prostaglandin G/H synthase 2
Ser/therionine protein phosphatases	Calcineurin inhibitors	Tacrolimus	Selective, competitive inhibitor in complex form	Peptidyl-prolyl cis-trans isomerase FKBP1A/FKBP-12
Antihelminthic	Multi-target	Niclosamide	a potent inhibitor of Notch signaling(K562 cells), inhibitory effect on β-catenin (Wnt Signaling) and mTORC1 (by acidification of cytoplasm)	STAT3, DNA
Protease inhibitors	Intramembrane aspartyl protease- γ-Secretase Inhibitors	Semagacestat	Pan-GSI, effect on Notch signaling pathway	PSEN1, γ-Secretase
		RO4929097/ RG-4733	Notch signaling pathway inhibitor	γ-Secretase
Antihyperlipidemic agents	HMG-CoA reductase inhibitors/ Statins	Pravastatin	reversible competitive inhibitor, modulates immune responses by suppressing MHC II, inhibiting hepatic synthesis of VLDL	HMGCR, SLCO1B1, HDAC2,
Molecular chaperons	HSP 90 inhibitors	Geldanamycin	Specific, binding to ADP/ATP-binding pocket of the protein, inhibits the ATPase activity	HSP 90-beta, HSP90-alpha, Endoplasmin (GP96)
Topoisomerases	TOP2 Poisons	etoposide	Non-DNA intercalative, DNA-TOP2 terniary complex inhibitor	TOP2A, TOP2B
Retinoid Receptors	Retinoid ligand	tretinoin	All-trans Retinoic Acid, ligand for both RAR and RXR	ALDH1A1, ALDH1A2, GPRC5A, NR0B1, NR2C2, PPARD, RARA, RARB, RARG, RARRES1, RORB, RORC, RXRB, RXRG, LCN1, OBP2A, RBP4, HPGDS
Steroid Hormones	Corticosteroid	Dexamethasone	synthetic adrenal corticosteroid, Glucocorticoid	ANXA1, NOS2, NR0B1, NR3C1, NR3C2
Phosphodiesterases	PDE4 inhibitors	Rolipram	Selective (non-selective within family)	PDE4A, PDE4B, PDE4D, PDE5A(preferably inhibits PDE4 isoform A)
SSB Repair	PARP inhibitors	Olaparib	Selective, competitive inhibitor of NAD+ at the catalytic site	PARP1, PARP2, PARP3
ROS Generators	Photosensitizing agents	Verteporfin	Light activated ROS generator (used in photodynamic therapy)	YAP1 inhibition, MAP4K3 and SPAK downregulation.
Natural Products	Biflavones	Ginkgetin	a potent inhibitor of Wnt signaling, VEGF binder	XDH, MCL1, GAR, COX2, arachidonate 5-lipoxygenase
	phytopolylphenol pigment	Curcumin	Non-selective, multi-target, HAT-inhibitory activity, may have effect on DNMTs and HDACs	PPAR-γ, VDR, ABCC5, CBR1, GSTP1, APP, CA-I, CA-II, CA-IV, CA-IX, CA-VI, CA-XII, CA-XIV, DNMT, DNMT3B, MMP-13, MMP-9, NOS2, COX-1, COX-2
*Drug Targets are collected from CLUE Repurposing Tool (https://clue.io/repurposing-app) on 2019,Nov.

## Sheet: Drugs_with_overlapping_networks
A375	MCF7	PC3	YAPC
*	MCF7_alvocidib	*	YAPC_alvocidib
A375_belinostat	MCF7_belinostat	PC3_belinostat	YAPC_dinaciclib
A375_BIX-01294	MCF7_BIX-01294	PC3_BIX-01294	YAPC_PD-0325901
A375_BIX-01338	MCF7_BIX-01338	PC3_BIX-01338	YAPC_selumetinib
A375_decitabine	MCF7_decitabine	PC3_decitabine
*	MCF7_dinaciclib	*
A375_entinostat	MCF7_entinostat	PC3_entinostat
A375_epz004777	MCF7_epz004777	PC3_epz004777
A375_EPZ-005687	MCF7_EPZ-005687	PC3_EPZ-005687
A375_etoposide	*	*
A375_EX-527	MCF7_EX-527	PC3_EX-527
A375_geldanamycin	MCF7_geldanamycin	PC3_geldanamycin
A375_GSK-J4	MCF7_GSK-J4	PC3_GSK-J4
A375_I-BET-151	MCF7_I-BET-151	PC3_I-BET-151
A375_I-BET-762	MCF7_I-BET-762	PC3_I-BET-762
A375_JQ1	MCF7_JQ1	PC3_JQ1
A375_LY-294002	MCF7_LY-294002	PC3_LY-294002
A375_methylstat	MCF7_methylstat	PC3_methylstat
A375_OSI-027	MCF7_OSI-027	PC3_OSI-027
A375_resveratrol	MCF7_resveratrol	PC3_resveratrol
A375_salermide	MCF7_salermide	PC3_salermide
A375_sirolimus	MCF7_sirolimus	PC3_sirolimus
A375_tacedinaline	MCF7_tacedinaline	PC3_tacedinaline
A375_trichostatin-a	MCF7_trichostatin-a	PC3_trichostatin-a
A375_UNC-0321	MCF7_UNC-0321	PC3_UNC-0321
A375_UNC-1215	MCF7_UNC-1215	PC3_UNC-1215
A375_zebularine	MCF7_zebularine	PC3_zebularine
